# Supplementary material for: Sandwich-structured nanohybrid paper based on controllable growth of nanostructured MnO2on ionic liquid functionalized graphene paper as a flexible supercapacitor electrode
Source: Royal Society of Chemistry journal article supplement (doi:10.1039/c5nr00946d), 2015-01-01
Supplement: c5nr00946d1.pdf [file c5nr00946d1.pdf]

*Electronic Supplementary Information for*

Sandwich-structured nanohybrid paper based on controllable growth  
of nanostructured MnO<sub>2</sub> on ionic liquid functionalized graphene  
paper as flexible supercapacitor electrode

Yimin Sun,<sup>\*a,b</sup> Zheng Fang,<sup>b</sup> Chenxu Wang,<sup>b</sup> K. R. Rakhitha Malinga Ariyawansa,<sup>b</sup> Aijun Zhou<sup>a</sup> and  
Hongwei Duan<sup>\*b</sup>

<sup>a</sup>School of Material Science and Engineering, Wuhan Institute of Technology, Wuhan, Hubei 430073,  
People's Republic of China

Email: ymsun1982@hotmail.com

<sup>b</sup>School of Chemical and Biomedical Engineering, Nanyang Technological University, 70 Nanyang  
Drive 637457, Singapore

Email: hduan@ntu.edu.sg

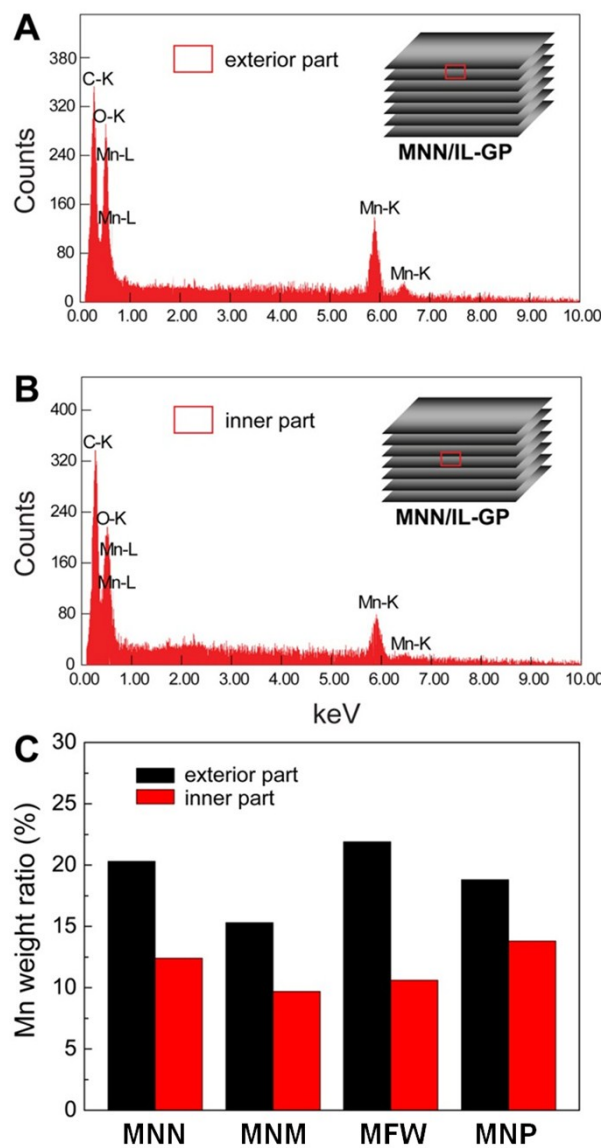

**Fig. S1** EDX spectra of (A) inner part and (B) exterior part of MNN/IL-GP. (C) Histograms of MnO<sub>2</sub> weight ratio for MNN/IL-GP, MNM/IL-GP, MFW/IL-GP and MNP/IL-GP electrodes estimated from the corresponding EDX analysis.

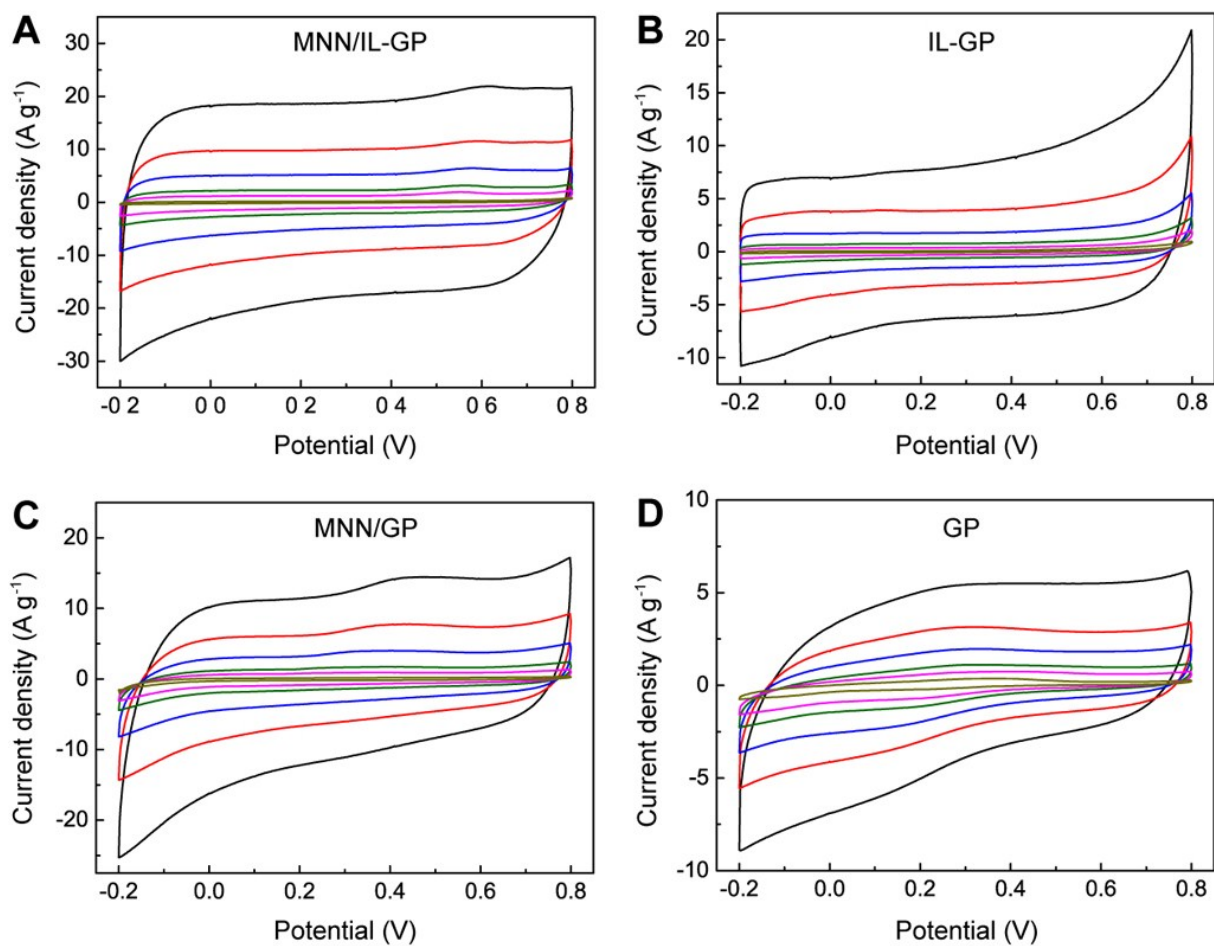

**Fig. S2** CV curves of (A) MNN/IL-GP, IL-GP, MNN/GP and GP at different scan rates (2, 5, 10, 20, 50, 100 and 200 mV s<sup>-1</sup>, from inner to outer) in 1.0 M aqueous Na<sub>2</sub>SO<sub>4</sub> electrolyte.

**Table R1** Comparison of the integrated area of CV curves and  $C_s$  derived from GV charging/discharging curves of different electrodes.

| Electrodes | Integrated area              | $C_s$ (F g <sup>-1</sup> ) derived from GV charging/discharging curves at |                     |                     |                      |                      |                      |
|------------|------------------------------|---------------------------------------------------------------------------|---------------------|---------------------|----------------------|----------------------|----------------------|
|            | (V A g <sup>-1</sup> ) of CV | different current densities                                               |                     |                     |                      |                      |                      |
|            | curves                       | 1 A g <sup>-1</sup>                                                       | 2 A g <sup>-1</sup> | 5 A g <sup>-1</sup> | 10 A g <sup>-1</sup> | 20 A g <sup>-1</sup> | 50 A g <sup>-1</sup> |
| GP         | 3.8                          | 85                                                                        | 69                  | 56                  | 37                   | 22                   | 10                   |
| IL-GP      | 6.3                          | 268                                                                       | 242                 | 210                 | 180                  | 143                  | 108                  |
| MNN/GP     | 8.6                          | 180                                                                       | 163                 | 129                 | 102                  | 87                   | 66                   |
| MNN/IL-GP  | 13.5                         | 415                                                                       | 400                 | 375                 | 346                  | 315                  | 297                  |
| MNM/IL-GP  | 10.5                         | 321                                                                       | 305                 | 276                 | 252                  | 226                  | 210                  |
| MFW/IL-GP  | 8.5                          | 256                                                                       | 240                 | 221                 | 197                  | 174                  | 152                  |
| MNP/IL-GP  | 7.4                          | 218                                                                       | 185                 | 155                 | 136                  | 113                  | 84                   |
